# Supplementary material for: Nanoarchitectonics of highly dispersed polythiophene on paper for accurate quantitative detection of metal ions
Source: Royal Society of Chemistry journal article supplement (doi:10.1039/d3ra08429a), 2024-01-01
Supplement: d3ra08429a1.pdf [file d3ra08429a1.pdf]

## Electronic Supplementary Information

### Nanoarchitectonics of highly dispersed polythiophene on paper for accurate quantitative detection of metal ions

Yui Sasaki,<sup>a,b</sup> Xiaojun Lyu,<sup>a</sup> Takayuki Kawashima,<sup>a</sup> Yijing Zhang,<sup>a</sup> Kohei Ohshiro,<sup>a</sup> Kiyosumi Okabe,<sup>a</sup> Kazuhiko Tsuchiya<sup>a</sup> and Tsuyoshi Minami\*<sup>a</sup>

<sup>a</sup> Institute of Industrial Science, The University of Tokyo, 4-6-1 Komaba, Meguro-ku, Tokyo, 153-8505, Japan. E-mail: tminami@g.ecc.u-tokyo.ac.jp

<sup>b</sup> JST, PRESTO, 4-1-8 Honcho, Kawaguchi, Saitama, 332-0012, Japan.

#### Contents

|                                         |     |
|-----------------------------------------|-----|
| 1. Synthesis of <b>1<sub>poly</sub></b> | S2  |
| 2. ESI-MS analysis                      | S2  |
| 3. DLS measurement                      | S2  |
| 4. Selected UV-vis titrations           | S3  |
| 5. Selected fluorescence titrations     | S4  |
| 6. Static quenching constants           | S6  |
| 7. Morphology analysis                  | S7  |
| 8. Humidity dependency                  | S7  |
| 9. Qualitative assay using LDA          | S8  |
| 10. Semi-quantitative using by LDA      | S10 |
| 11. Real-sample analysis using SVM      | S11 |
| References                              | S13 |

## 1. Synthesis of **1<sub>poly</sub>**

The polythiophene derivative (**1<sub>poly</sub>**) was obtained by oxidative polymerization of a dpa-attached thiophene monomer (**1**) with FeCl<sub>3</sub>.<sup>S1</sup> Monomer **2** was synthesized according to a previous report,<sup>S2</sup> for obtaining **1** by the introduction of 2,2'-dipicolylamine into **2**. A methyl group-substituted thiophene monomer at 4-position was employed to avoid the generation of byproducts ( $\alpha$ - $\beta'$  coupling) in the polymerization process.<sup>S3,S4</sup> The polymerization method was selected from the viewpoint of reactivity to heterocyclic amine-attached thiophene monomers and the yield of homopolymers.<sup>S5,S6</sup> The polymerization was carried out after substituting the dpa unit into the thiophene ring to avoid the formation of heterogeneous copolymers of **2** and unreacted starting material (**1**). In addition, thermal extraction was performed with a mixture of methanol and hydrazine monohydrate to remove Fe ions from the obtained product. NMR analysis result of **1<sub>poly</sub>** indicated that regioselective product with head-to-tail orientation with high yields (80–90%).<sup>S1,S6</sup>

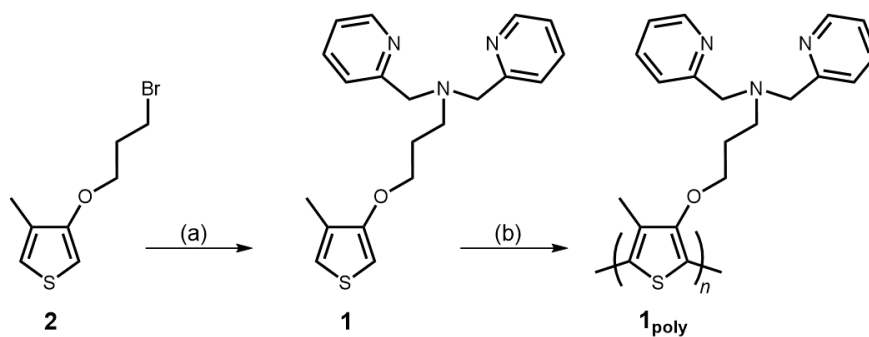

**Scheme S1** Synthesis of the dpa-attached PT (**1<sub>poly</sub>**). (a) 2,2'-Dipicolylamine, K<sub>2</sub>CO<sub>3</sub>, CH<sub>3</sub>CN, reflux, (b) FeCl<sub>3</sub>, dry CHCl<sub>3</sub>, r. t. These materials, **1**, **2**, and **1<sub>poly</sub>** were obtained according to a previously reported protocol.<sup>S1</sup>

## 2. ESI-MS analysis

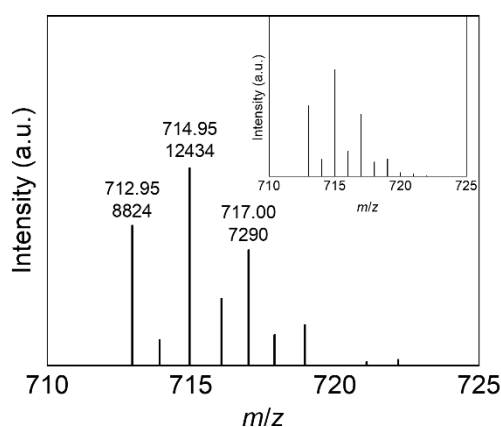

**Fig. S1** An ESI-MS spectrum for the complex of **1** and Cu(ClO<sub>4</sub>)<sub>2</sub> in MeOH. The inset shows calculated isotope patterns. [**1**] = [Cu(ClO<sub>4</sub>)<sub>2</sub>] = 2.8×10<sup>-3</sup> M. Mobile phase: MeOH. MS (ESI, -) *m/z*: [**1**+Cu+3ClO<sub>4</sub>]<sup>-</sup>, C<sub>20</sub>H<sub>23</sub>Cl<sub>3</sub>CuN<sub>3</sub>O<sub>13</sub>S 715.36; Found: 714.95.

### 3. DLS measurement

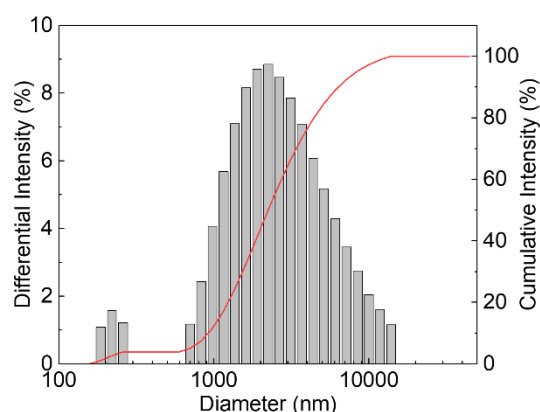

**Fig. S2** Histogram for the particle-size distribution of  $1_{\text{poly}}$  ( $4.0 \times 10^{-4}$  M/unit) upon the addition of  $\text{Cu}^{2+}$  ions ( $3.0 \times 10^{-3}$  M) in an aqueous MeOH solution (MeOH:water = 3:1, v/v) containing MES (12.5 mM) and NaCl (12.5 mM) at pH 5.5 at 25 °C.

### 4. Selected UV-vis titrations

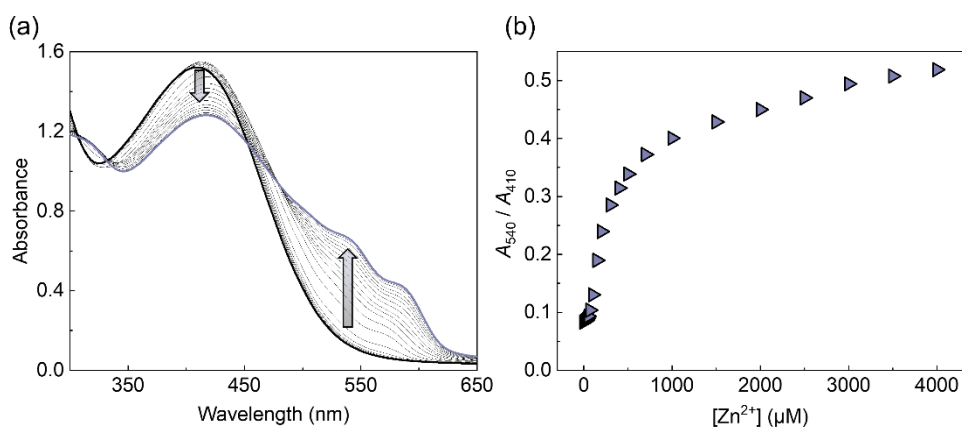

**Fig. S3** (a) UV-vis absorption spectra of  $1_{\text{poly}}$  ( $4.0 \times 10^{-4}$  M/unit) upon the addition of  $\text{Zn}^{2+}$  ions in an aqueous MeOH solution (MeOH:water = 3:1, v/v) containing MES (12.5 mM) and NaCl (12.5 mM) at pH 5.5 at 25 °C. (b) Concentration dependency of the relative absorbance ( $A_{540}/A_{410}$ ).  $[\text{Zn}^{2+}] = 0.0 - 4.0 \times 10^{-3}$  M.

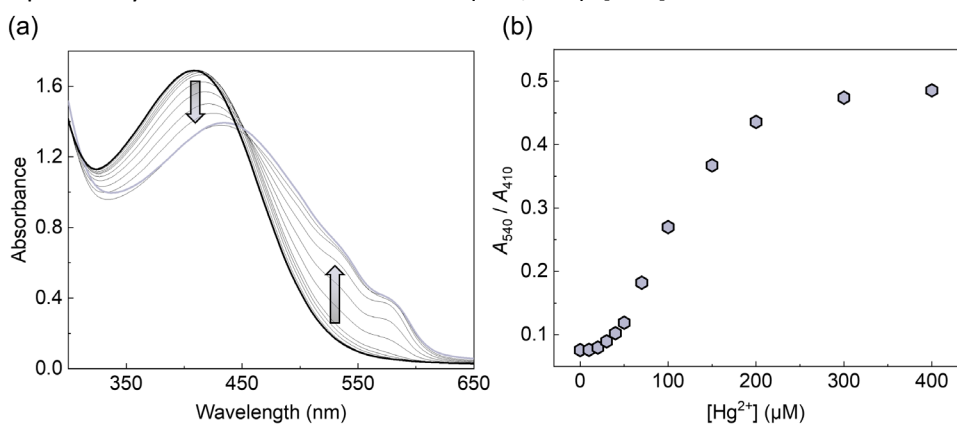

**Fig. S4** (a) UV-vis absorption spectra of  $1_{\text{poly}}$  ( $4.0 \times 10^{-4}$  M/unit) upon the addition of  $\text{Hg}^{2+}$  ions in an aqueous MeOH solution (MeOH:water = 3:1, v/v) containing MES (12.5 mM) and NaCl (12.5 mM) at pH 5.5 at 25 °C. (b) Concentration dependency of the relative absorbance ( $A_{540}/A_{410}$ ).  $[\text{Hg}^{2+}] = 0.0 - 4.0 \times 10^{-4}$  M.

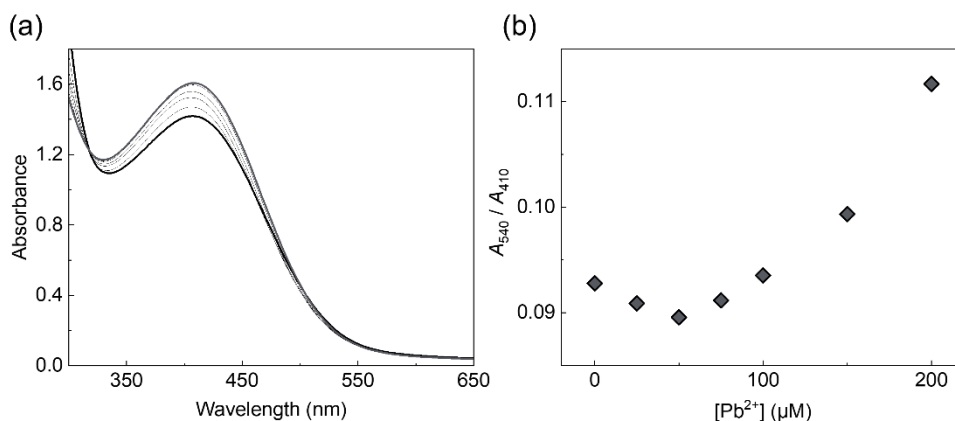

**Fig. S5** (a) UV-vis absorption spectra of  $1_{\text{Poly}}$  ( $4.0 \times 10^{-4}$  M/unit) upon the addition of  $\text{Pb}^{2+}$  ions in an aqueous MeOH solution (MeOH:water = 3:1, v/v) containing MES (12.5 mM) and NaCl (12.5 mM) at pH 5.5 at 25 °C. (b) Concentration dependency of the relative absorbance ( $A_{540}/A_{410}$ ). [ $\text{Pb}^{2+}$ ] = 0.0 –  $2.0 \times 10^{-4}$  M. Precipitation was observed at high concentrations of the  $\text{Pb}^{2+}$  ions ( $\geq 3.0 \times 10^{-4}$  M).

## 5. Selected fluorescence titrations

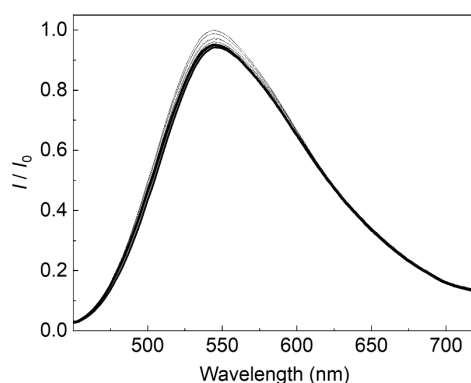

**Fig. S6** Fluorescence spectra of  $1_{\text{Poly}}$  ( $4.0 \times 10^{-5}$  M/unit) upon the addition of  $\text{Zn}^{2+}$  ions in an aqueous MeOH solution (MeOH:water = 3:1, v/v) containing MES (12.5 mM) and NaCl (12.5 mM) at pH 5.5 at 25 °C.  $\lambda_{\text{ex}} = 425$  nm. [ $\text{Zn}^{2+}$ ] = 0.0 –  $4.0 \times 10^{-5}$  M.

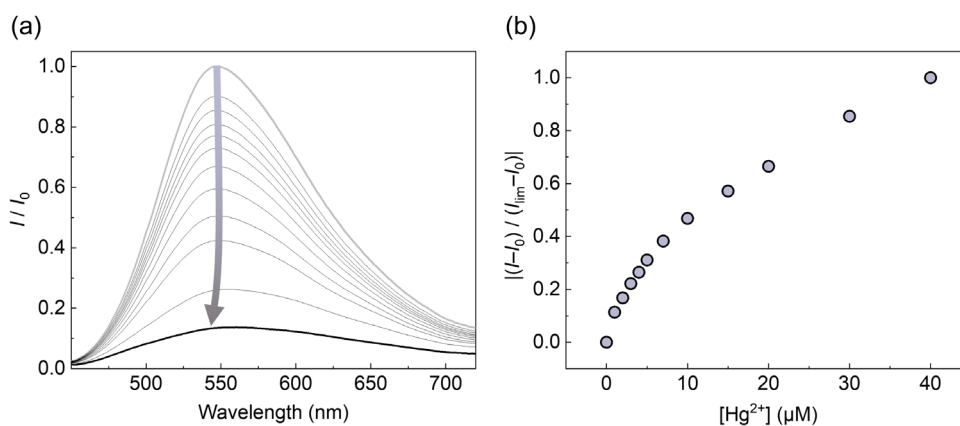

**Fig. S7** (a) Fluorescence spectra of  $1_{\text{Poly}}$  ( $4.0 \times 10^{-5}$  M/unit) upon the addition of  $\text{Hg}^{2+}$  ions in an aqueous MeOH solution (MeOH:water = 3:1, v/v) containing MES (12.5 mM) and NaCl (12.5 mM) at pH 5.5 at 25 °C.  $\lambda_{\text{ex}} = 425$  nm. (b) Concentration dependency of fluorescence change at  $\lambda_{\text{em}} = 550$  nm. [ $\text{Hg}^{2+}$ ] = 0.0 –  $4.0 \times 10^{-5}$  M.

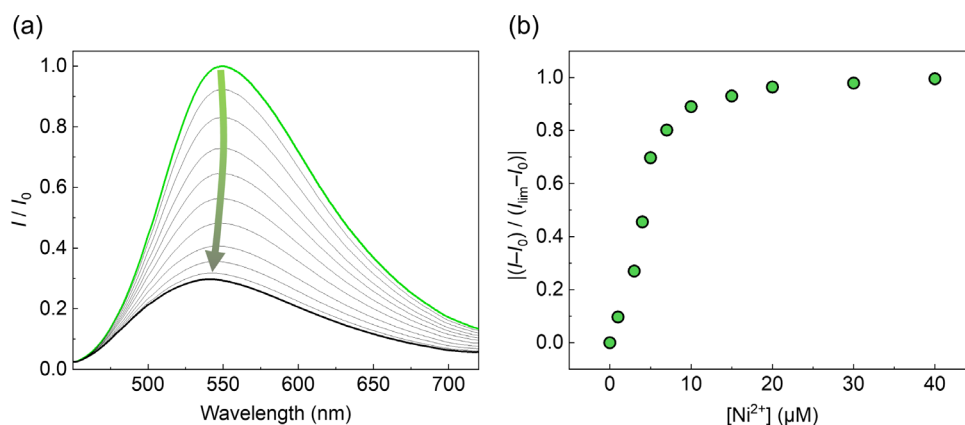

**Fig. S8** (a) Fluorescence spectra of  $1_{\text{Poly}}$  ( $4.0 \times 10^{-5}$  M/unit) upon the addition of  $\text{Ni}^{2+}$  ions in an aqueous MeOH solution (MeOH:water = 3:1, v/v) containing MES (12.5 mM) and NaCl (12.5 mM) at pH 5.5 at 25 °C.  $\lambda_{\text{ex}} = 425$  nm. (b) Concentration dependency of fluorescence change at  $\lambda_{\text{em}} = 550$  nm.  $[\text{Ni}^{2+}] = 0.0 - 4.0 \times 10^{-5}$  M.

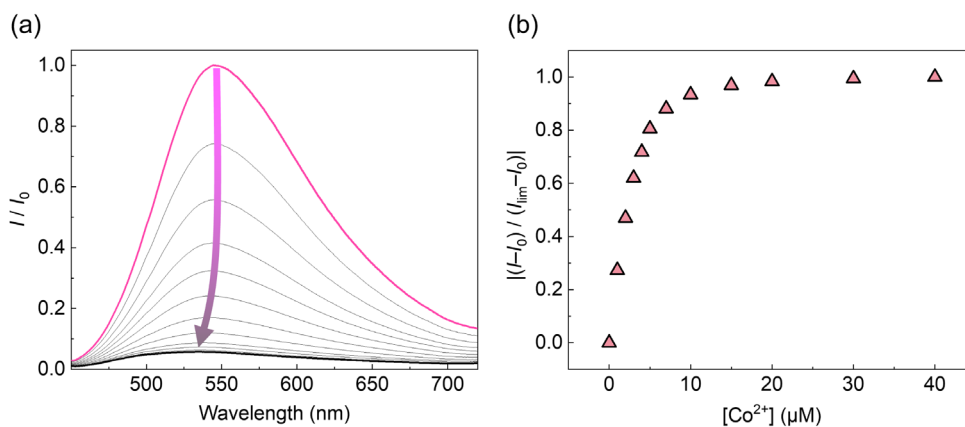

**Fig. S9** (a) Fluorescence spectra of  $1_{\text{Poly}}$  ( $4.0 \times 10^{-5}$  M/unit) upon the addition of  $\text{Co}^{2+}$  ions in an aqueous MeOH solution (MeOH:water = 3:1, v/v) containing MES (12.5 mM) and NaCl (12.5 mM) at pH 5.5 at 25 °C.  $\lambda_{\text{ex}} = 425$  nm. (b) Concentration dependency of fluorescence change at  $\lambda_{\text{em}} = 550$  nm.  $[\text{Co}^{2+}] = 0.0 - 4.0 \times 10^{-5}$  M.

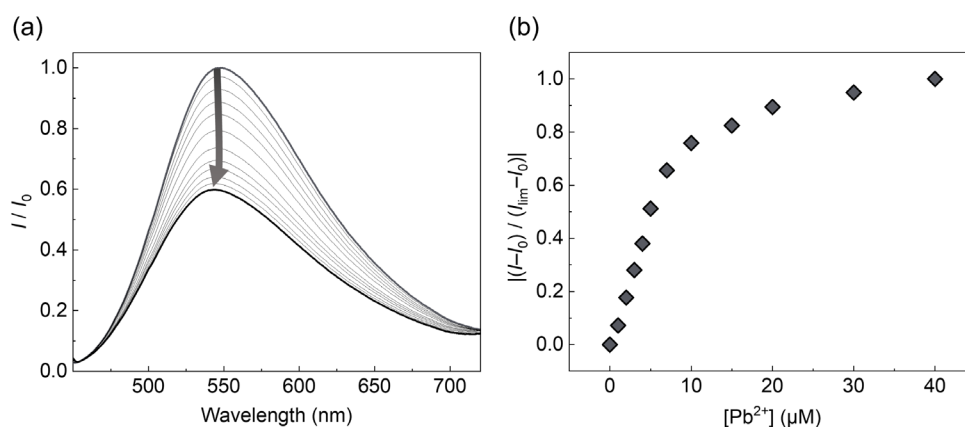

**Fig. S10** (a) Fluorescence spectra of  $1_{\text{Poly}}$  ( $4.0 \times 10^{-5}$  M/unit) upon the addition of  $\text{Pb}^{2+}$  ions in an aqueous MeOH solution (MeOH:water = 3:1, v/v) containing MES (12.5 mM) and NaCl (12.5 mM) at pH 5.5 at 25 °C.  $\lambda_{\text{ex}} = 425$  nm. (b) Concentration dependency of fluorescence change at  $\lambda_{\text{em}} = 550$  nm.  $[\text{Pb}^{2+}] = 0.0 - 4.0 \times 10^{-5}$  M.

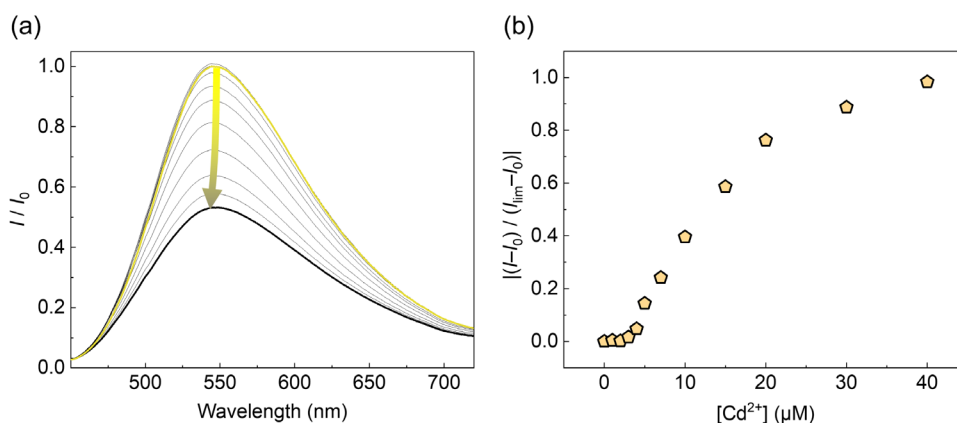

**Fig. S11** (a) Fluorescence spectra of **1<sub>Poly</sub>** ( $4.0 \times 10^{-5}$  M/unit) upon the addition of  $\text{Cd}^{2+}$  ions in an aqueous MeOH solution (MeOH:water = 3:1, v/v) containing MES (12.5 mM) and NaCl (12.5 mM) at pH 5.5 at 25 °C.  $\lambda_{\text{ex}} = 425$  nm. (b) Concentration dependency of fluorescence change at  $\lambda_{\text{em}} = 550$  nm.  $[\text{Cd}^{2+}] = 0.0 - 4.0 \times 10^{-5}$  M.

## 6. Static quenching constants

With an increase in quencher concentrations (*i.e.*, metal ions), the decrease in fluorescence emission intensity of the fluorophore (**1<sub>Poly</sub>**) corresponds to the quencher concentrations as described by the Stern–Volmer relationship (eq. 1);<sup>57</sup>

$$\frac{I_0}{I} = (1 + K_{SV}[Q])(1 + K_S[Q]) = 1 + (K_{SV} + K_S)[Q] + K_{SV}K_S[Q]^2 \quad (1)$$

where  $I_0$  and  $I$  are the fluorescence emission intensity in the absence and the presence of a quencher metal ion,  $K_{SV}$  is the Stern–Volmer quenching constant (for dynamic quenching),  $K_S$  is the static quenching constant, and  $[Q]$  is the concentration of the quencher metal ions. Since  $K_S$  is more dominant than  $K_{SV}$  in the case of polymer-based fluorescent materials in aqueous buffer solutions, the dynamic quenching is ignorable.<sup>58</sup>

**Table S1** The static quenching constants of **1<sub>Poly</sub>** ( $\text{M}^{-1}$ )

| Metal ions       | $K_S$ ( $\text{M}^{-1}$ ) |
|------------------|---------------------------|
| $\text{Zn}^{2+}$ | N.D. <sup>a)</sup>        |
| $\text{Cu}^{2+}$ | $2.0 \times 10^6$         |
| $\text{Cd}^{2+}$ | $2.6 \times 10^4$         |
| $\text{Ni}^{2+}$ | $1.2 \times 10^5$         |
| $\text{Co}^{2+}$ | $8.2 \times 10^5$         |
| $\text{Pb}^{2+}$ | $4.6 \times 10^4$         |
| $\text{Hg}^{2+}$ | $7.0 \times 10^3$         |

a) N.D.: not determined owing to no contribution as the quencher metal ion.

## 7. Morphology analysis

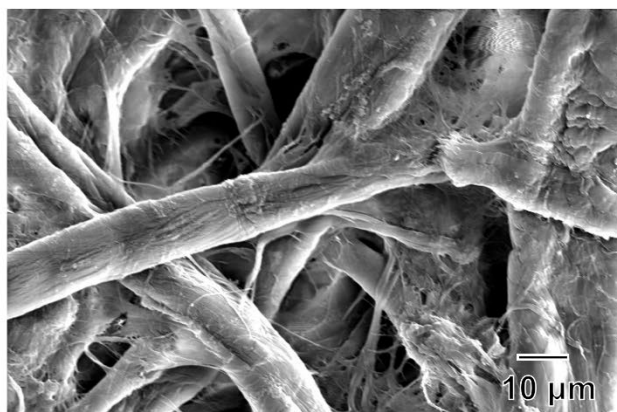

Fig. S12 FE-SEM image of the  $1_{\text{Poly}}$ -printed PCSAD after adding  $\text{Cu}^{2+}$  ions ( $3.0 \times 10^{-3}$  M).

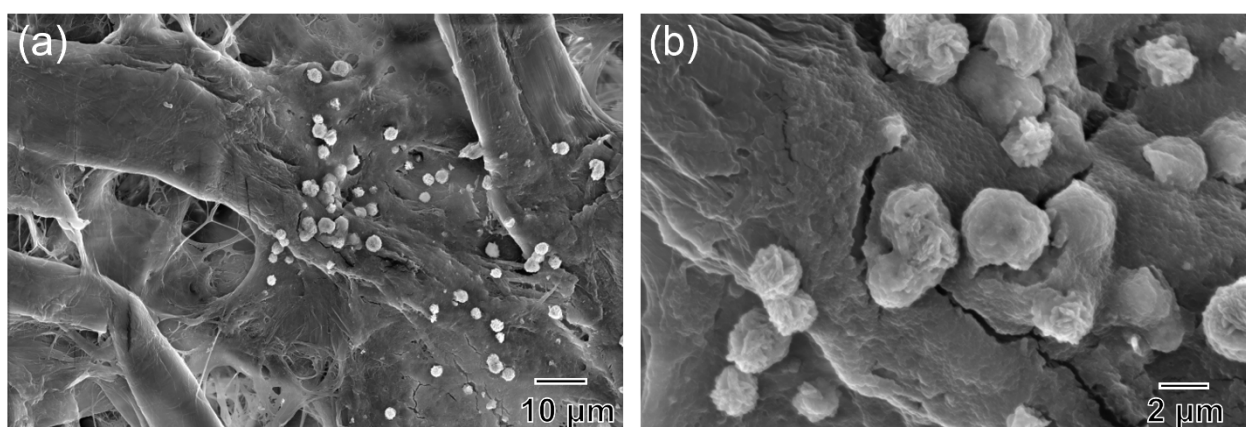

Fig. S13 FE-SEM images of the PCSAD after drop-casting of a mixture of  $1_{\text{Poly}}$  ( $4.0 \times 10^{-4}$  M/unit) and  $\text{Cu}^{2+}$  ions ( $3.0 \times 10^{-3}$  M) at (a) 1000 and (b) 5000 magnification.

## 8. Humidity dependency

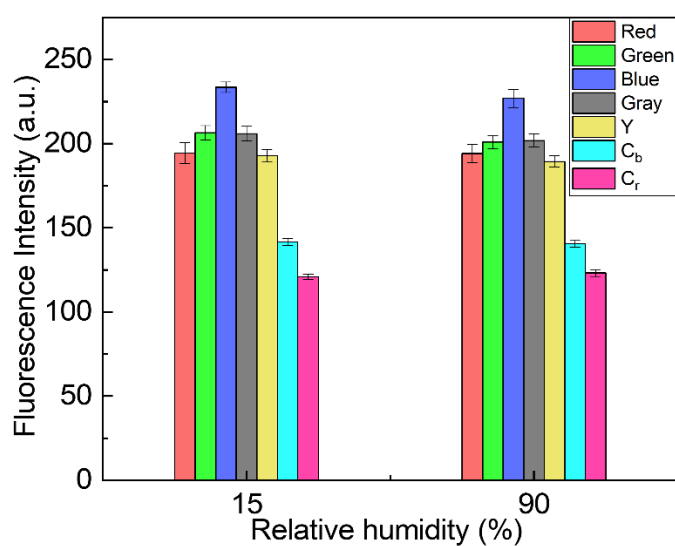

Fig. S14 The fluorescence intensity of the printed  $1_{\text{Poly}}$  on the 384 wells before (15% at 25 °C) and after exposure to high humidity (95% at 25 °C).

## Qualitative assay using LDA

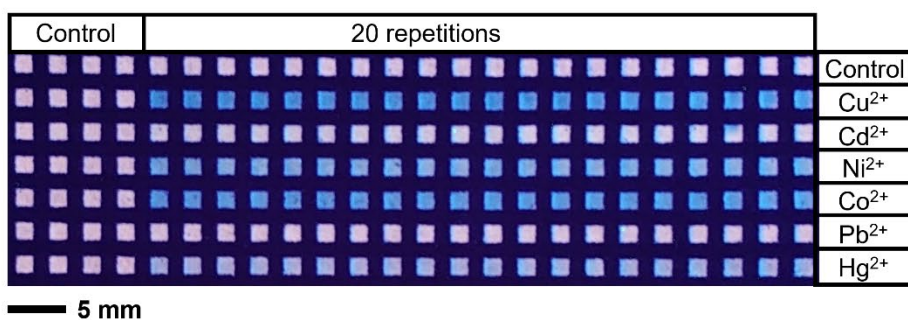

**Fig. S15** Fluorescent responses of the PCSAD embedded with  $1_{\text{poly}}$  upon the addition of metal ions ( $5.0 \times 10^{-5}$  M), which was acquired by using a smartphone. The surface of the PCSAD was irradiated by using two handy black lights (4 and 16 W at  $\lambda_{\text{ex}} = 365$  nm).

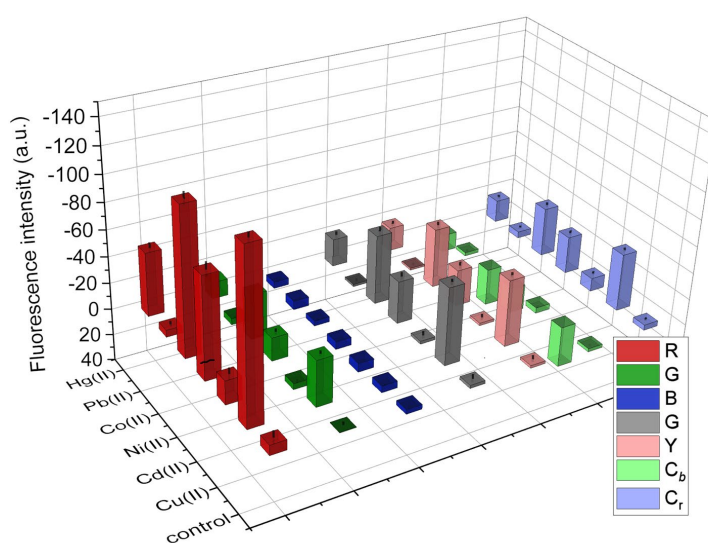

**Fig. S16** Fluorescent intensity profile on the 384-well microtiter PCSAD upon the addition of metal ions in an MES buffer solution (1 mM) with NaCl (1 mM) at pH 5.5. The fluorescence responses of the devices after adding metal ions ( $1 \mu\text{L}/\text{well}$ ,  $3.0 \times 10^{-5}$  M) were recorded under the irradiation of two handy black lights at 365 nm.  $\Delta$  Fluorescence intensity before and after adding metal ions was employed for the bar graph.



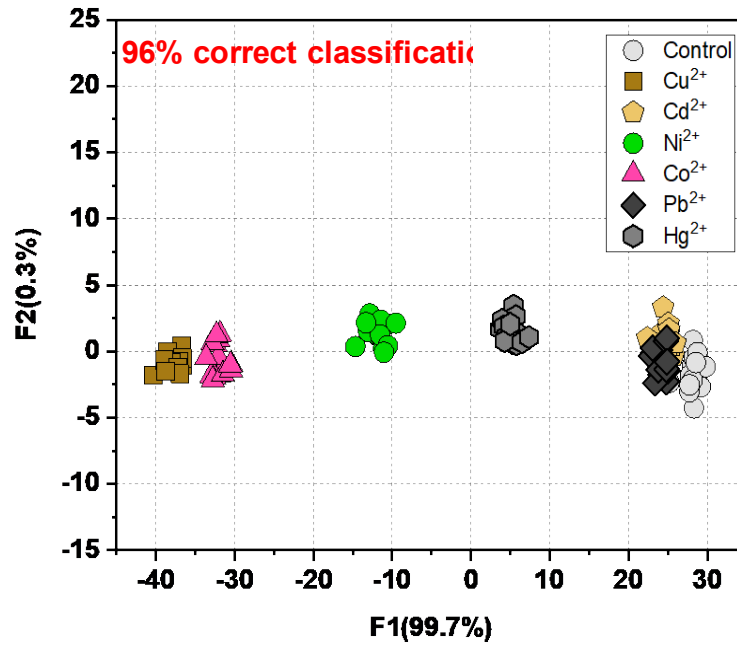

Fig. S17 Qualitative assay against 6 metal ions ( $3.0 \times 10^{-5}$  M). Each measurement was repeated 16 times.

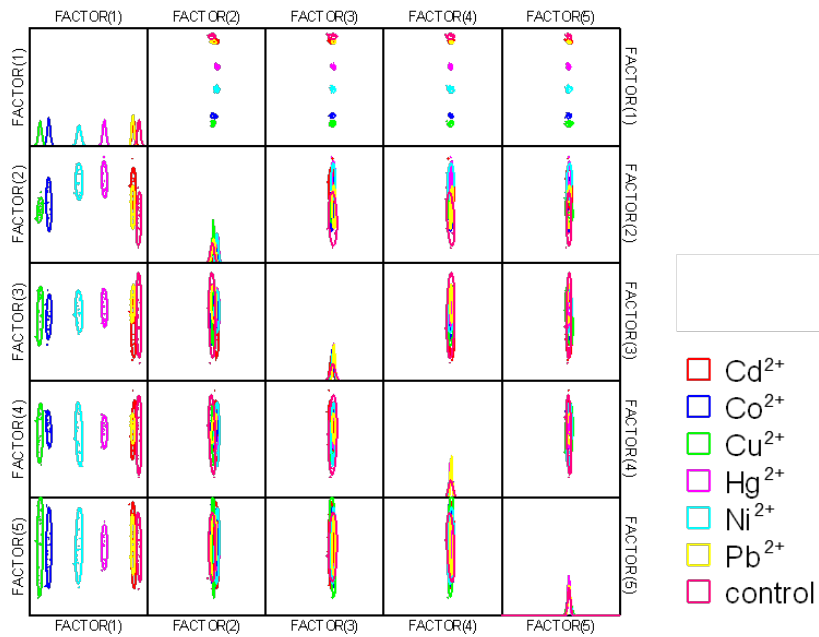

Fig. S18 The canonical score plot of the qualitative assay.

**Table S2** The jackknifed classification matrix of the qualitative assay for 6 metal ions

|                  | Cd <sup>2+</sup> | Co <sup>2+</sup> | Cu <sup>2+</sup> | Hg <sup>2+</sup> | Ni <sup>2+</sup> | Pb <sup>2+</sup> | control | %correct |
|------------------|------------------|------------------|------------------|------------------|------------------|------------------|---------|----------|
| Cd <sup>2+</sup> | 13               | 0                | 0                | 0                | 0                | 3                | 0       | 81       |
| Co <sup>2+</sup> | 0                | 16               | 0                | 0                | 0                | 0                | 0       | 100      |
| Cu <sup>2+</sup> | 0                | 0                | 16               | 0                | 0                | 0                | 0       | 100      |
| Hg <sup>2+</sup> | 0                | 0                | 0                | 16               | 0                | 0                | 0       | 100      |
| Ni <sup>2+</sup> | 0                | 0                | 0                | 0                | 16               | 0                | 0       | 100      |
| Pb <sup>2+</sup> | 1                | 0                | 0                | 0                | 0                | 15               | 0       | 94       |
| control          | 0                | 0                | 0                | 0                | 0                | 1                | 15      | 94       |
| Total            | 14               | 16               | 16               | 16               | 16               | 19               | 15      | 96       |

## 9. Semi-quantitative assay using LDA

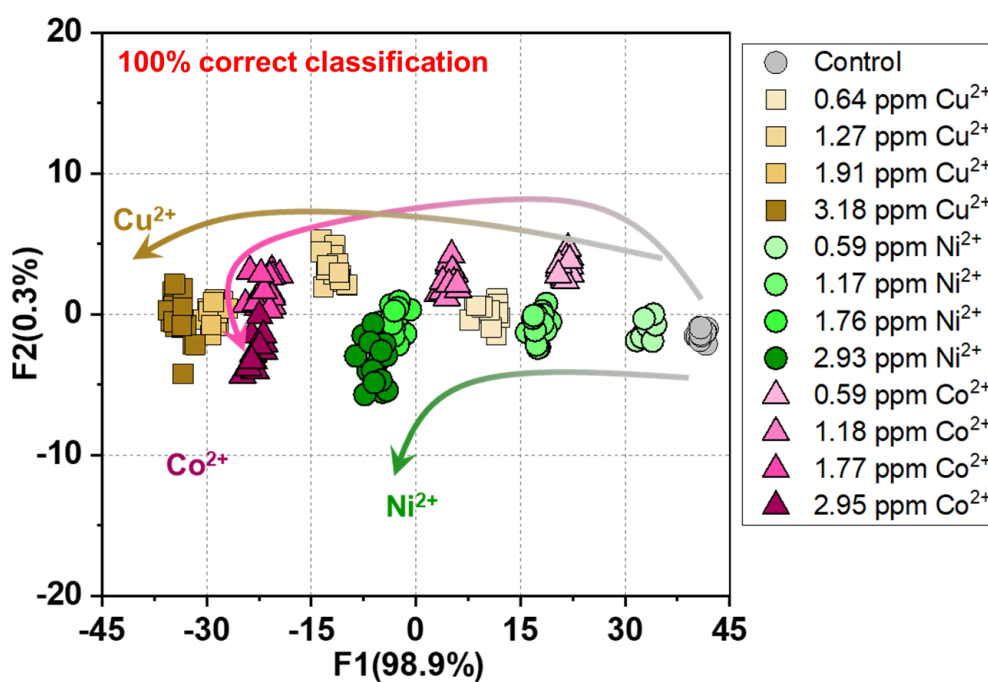

**Fig. S19** Semi-quantitative assay against Cu<sup>2+</sup>, Ni<sup>2+</sup>, and Co<sup>2+</sup> ions. Each measurement was repeated 16 times.

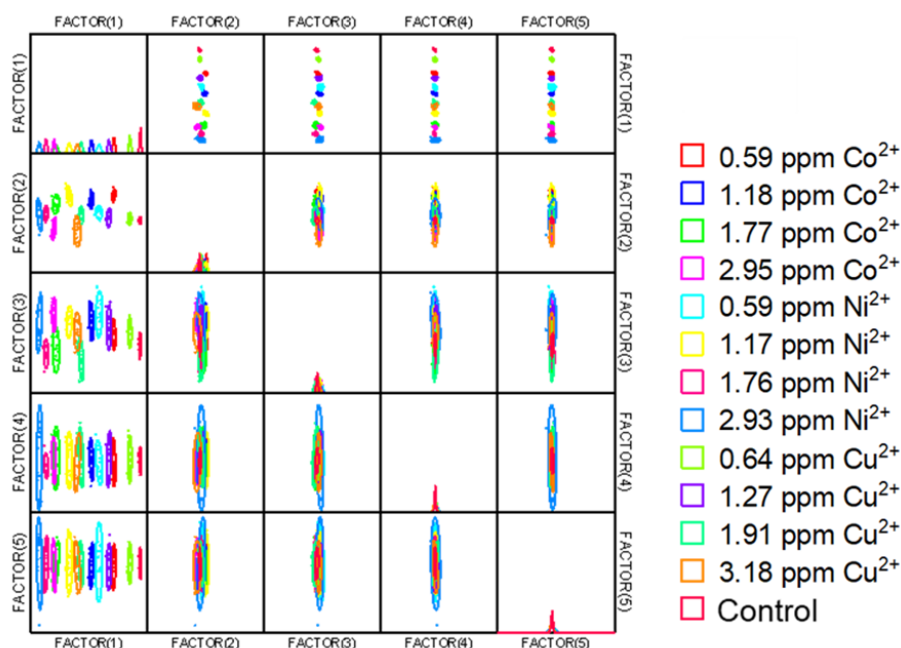

Fig. S20 The canonical score plot of the semi-quantitative assay.

Table S3 The jackknifed classification matrix of the semi-quantitative assay for  $\text{Co}^{2+}$ ,  $\text{Ni}^{2+}$ , and  $\text{Cu}^{2+}$  ions

|                           | $\text{Co}^{2+}$ 0.59 ppm | $\text{Co}^{2+}$ 1.18 ppm | $\text{Co}^{2+}$ 1.77 ppm | $\text{Co}^{2+}$ 2.95 ppm | $\text{Co}^{2+}$ 0.59 ppm | $\text{Ni}^{2+}$ 0.59 ppm | $\text{Ni}^{2+}$ 1.17 ppm | $\text{Ni}^{2+}$ 1.76 ppm | $\text{Ni}^{2+}$ 2.93 ppm | $\text{Cu}^{2+}$ 0.64 ppm | $\text{Cu}^{2+}$ 1.27 ppm | $\text{Cu}^{2+}$ 1.91 ppm | $\text{Cu}^{2+}$ 3.18 ppm | control | %correct |
|---------------------------|---------------------------|---------------------------|---------------------------|---------------------------|---------------------------|---------------------------|---------------------------|---------------------------|---------------------------|---------------------------|---------------------------|---------------------------|---------------------------|---------|----------|
| $\text{Co}^{2+}$ 0.59 ppm | 16                        | 0                         | 0                         | 0                         | 0                         | 0                         | 0                         | 0                         | 0                         | 0                         | 0                         | 0                         | 0                         | 0       | 100      |
| $\text{Co}^{2+}$ 1.18 ppm | 0                         | 16                        | 0                         | 0                         | 0                         | 0                         | 0                         | 0                         | 0                         | 0                         | 0                         | 0                         | 0                         | 0       | 100      |
| $\text{Co}^{2+}$ 1.77 ppm | 0                         | 0                         | 16                        | 0                         | 0                         | 0                         | 0                         | 0                         | 0                         | 0                         | 0                         | 0                         | 0                         | 0       | 100      |
| $\text{Co}^{2+}$ 2.95 ppm | 0                         | 0                         | 0                         | 16                        | 0                         | 0                         | 0                         | 0                         | 0                         | 0                         | 0                         | 0                         | 0                         | 0       | 100      |
| $\text{Co}^{2+}$ 0.59 ppm | 0                         | 0                         | 0                         | 0                         | 16                        | 0                         | 0                         | 0                         | 0                         | 0                         | 0                         | 0                         | 0                         | 0       | 100      |
| $\text{Ni}^{2+}$ 0.59 ppm | 0                         | 0                         | 0                         | 0                         | 0                         | 16                        | 0                         | 0                         | 0                         | 0                         | 0                         | 0                         | 0                         | 0       | 100      |
| $\text{Ni}^{2+}$ 1.17 ppm | 0                         | 0                         | 0                         | 0                         | 0                         | 0                         | 16                        | 0                         | 0                         | 0                         | 0                         | 0                         | 0                         | 0       | 100      |
| $\text{Ni}^{2+}$ 1.76 ppm | 0                         | 0                         | 0                         | 0                         | 0                         | 0                         | 0                         | 16                        | 0                         | 0                         | 0                         | 0                         | 0                         | 0       | 100      |
| $\text{Ni}^{2+}$ 2.93 ppm | 0                         | 0                         | 0                         | 0                         | 0                         | 0                         | 0                         | 1                         | 15                        | 0                         | 0                         | 0                         | 0                         | 0       | 100      |
| $\text{Cu}^{2+}$ 0.64 ppm | 0                         | 0                         | 0                         | 0                         | 0                         | 0                         | 0                         | 0                         | 0                         | 16                        | 0                         | 0                         | 0                         | 0       | 94       |
| $\text{Cu}^{2+}$ 1.27 ppm | 0                         | 0                         | 0                         | 0                         | 0                         | 0                         | 0                         | 0                         | 0                         | 0                         | 16                        | 0                         | 0                         | 0       | 100      |
| $\text{Cu}^{2+}$ 1.91 ppm | 0                         | 0                         | 0                         | 0                         | 0                         | 0                         | 0                         | 0                         | 0                         | 0                         | 0                         | 16                        | 0                         | 0       | 100      |
| $\text{Cu}^{2+}$ 3.18 ppm | 0                         | 0                         | 0                         | 0                         | 0                         | 0                         | 0                         | 0                         | 0                         | 0                         | 0                         | 0                         | 16                        | 0       | 100      |
| control                   | 0                         | 0                         | 0                         | 0                         | 0                         | 0                         | 0                         | 0                         | 0                         | 0                         | 0                         | 0                         | 0                         | 16      | 100      |
| Total                     | 16                        | 16                        | 16                        | 16                        | 16                        | 16                        | 16                        | 17                        | 15                        | 16                        | 16                        | 16                        | 16                        | 16      | 100      |

## 10. Real-sample analysis using SVM

Table S4 The spiked and recovery test using the PCSAD for metal ions in the river water sample

|             |                  | Added (ppm) | Found (ppm) | Recovery (%) |                  | Added (ppm) | Found (ppm) | Recovery (%) |                  | Added (ppm) | Found (ppm) | Recovery (%) |
|-------------|------------------|-------------|-------------|--------------|------------------|-------------|-------------|--------------|------------------|-------------|-------------|--------------|
| River water | $\text{Cu}^{2+}$ | 0.64        | 0.61        | 96           | $\text{Co}^{2+}$ | 0.59        | 0.64        | 109          | $\text{Ni}^{2+}$ | 0.29        | 0.29        | 99           |
|             |                  | 0.95        | 1.00        | 105          |                  | 0.88        | 0.92        | 104          |                  | 0.59        | 0.58        | 99           |
|             |                  | 1.27        | 1.38        | 109          |                  | 1.18        | 1.13        | 96           |                  | 0.88        | 0.90        | 102          |

Table S5 The elements of the original river water sample

| Element | Concentration                |
|---------|------------------------------|
| B       | 44.0 $\mu\text{g}/\text{kg}$ |
| Al      | 21.8 $\mu\text{g}/\text{kg}$ |
| Cr      | 5.16 $\mu\text{g}/\text{kg}$ |
| Mn      | 5.04 $\mu\text{g}/\text{kg}$ |

|    |              |
|----|--------------|
| Fe | 27.1 µg/kg   |
| Ni | 1.06 µg/kg   |
| Cu | 10.1 µg/kg   |
| Zn | 10.6 µg/kg   |
| As | 1.17 µg/kg   |
| Se | 1.03 µg/kg   |
| Rb | 0.653 µg/kg  |
| Sr | 33.5 µg/kg   |
| Mo | 0.183 µg/kg  |
| Cd | 1.01 µg/kg   |
| Sb | 0.0095 µg/kg |
| Ba | 5.74 µg/kg   |
| Pb | 1.018 µg/kg  |
| Na | 3.68 mg/kg   |
| Mg | 1.26 mg/kg   |
| K  | 0.836 mg/kg  |
| Ca | 4.59 mg/kg   |

**Table S6.** The spiked and recovery test for the Cu<sup>2+</sup> ions in the commercial artificial seawater sample

|                                              |                        | Added (ppm) | Found (ppm) | Recovery (%) |
|----------------------------------------------|------------------------|-------------|-------------|--------------|
| <b>Commercial artificial seawater sample</b> | <b>Cu<sup>2+</sup></b> | 0.64        | 0.56        | 88%          |
|                                              |                        | 0.95        | 0.78        | 81%          |
|                                              |                        | 1.27        | 1.07        | 84%          |

**Table S7.** The ingredient list of the commercial artificial seawater sample

| Ingredient                                                         | Concentration (ppm) |
|--------------------------------------------------------------------|---------------------|
| MgCl <sub>2</sub> · 6H <sub>2</sub> O                              | 9474                |
| CaCl <sub>2</sub> · 2H <sub>2</sub> O                              | 1326                |
| Na <sub>2</sub> SO <sub>4</sub>                                    | 3505                |
| KCl                                                                | 597                 |
| NaHCO <sub>3</sub>                                                 | 171                 |
| KBr                                                                | 85                  |
| Na <sub>2</sub> B <sub>4</sub> O <sub>7</sub> · 10H <sub>2</sub> O | 34                  |
| SrCl <sub>2</sub>                                                  | 12                  |
| NaF                                                                | 3                   |
| LiCl                                                               | 1                   |

|                                                                                     |        |
|-------------------------------------------------------------------------------------|--------|
| KI                                                                                  | 0.07   |
| CoCl <sub>2</sub> · 6H <sub>2</sub> O                                               | 0.0002 |
| AlCl <sub>3</sub> · 6H <sub>2</sub> O                                               | 0.008  |
| FeCl <sub>3</sub> · 6H <sub>2</sub> O                                               | 0.005  |
| Na <sub>2</sub> WO <sub>4</sub> · 2H <sub>2</sub> O                                 | 0.0002 |
| (NH <sub>4</sub> ) <sub>6</sub> Mo <sub>7</sub> O <sub>24</sub> · 4H <sub>2</sub> O | 0.02   |
| MnCl <sub>2</sub> · 4H <sub>2</sub> O                                               | 0.0008 |
| NaCl                                                                                | 20747  |

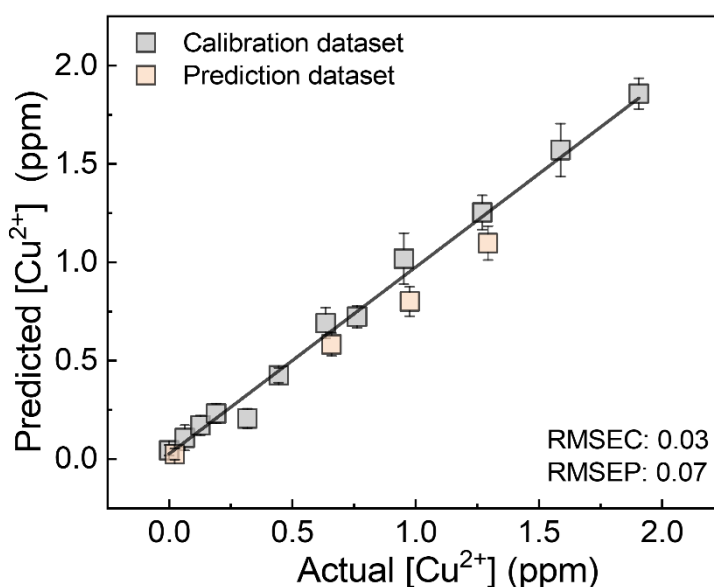

**Fig. S21** Regression analysis using SVM for the Cu<sup>2+</sup> ions in the commercial artificial seawater sample.

## References

1. Y. Sasaki, K. Ohshiro, K. Okabe, X. Lyu, K. Tsuchiya, A. Matsumoto, S. Takizawa and T. Minami, *Chem. Asian. J.*, 2023, **18**, e202300372.
2. D. Cheng, Y. Li, J. Wang, Y. Sun, L. Jin, C. Li and Y. Lu, *Chem. Commun.* 2015, **51**, 8544.
3. K. Tsuchiya and K. Ogino, *Polym. J.* 2013, **45**, 281.
4. D. Thanasamy, D. Jesuraj, S. K. Konda Kannan and V. Avadhanam, *Polymer* 2019, **175**, 32.
5. K. Yao, L. Chen, F. Li, P. Wang and Y. Chen, *J. Phys. Chem. C* 2012, **116**, 714.
6. S. Amou, O. Haba, K. Shirato, T. Hayakawa, M. Ueda, K. Takeuchi and M. Asai, *J. Polym. Sci.* 1999, **37**, 1943.
7. L. Cisse, A. Djande, M. Capo-Chichi, F. Delattre, A. Saba, J.-C. Brochon, S. Sanouski, A. Tine and J.-J. Aaron, *J. Fluoresc.*, 2017, **27**, 619-628.
8. J. Wang, D. Wang, E. K. Miller, D. Moses, G. C. Bazan, and A. J. Heeger, *Macromolecules*, 2000, **33**, 5153–5158.
